# Supplementary material for: The Costs of Psoriasis Medications
Source: Springer Nature journal article supplement (doi:10.1007/s13555-013-0040-z), 2013-12-01
Supplement: MOESM1 [file 9271006]

- The study was based on 236 Psoriasis (Ps) and Psoriatic Arthritis (PsA) patients visiting a tertiary level hospital dermatological clinic during a one year study-period (1 October 2009 - 30 September 2010).
- Reliable data on medication was acquired from the social insurer in Finland and clinical information was collected from hospitals' medical records.
- This study showed that patients needing multiple different treatments suffer from worse quality of life and generate considerably higher medication costs than patients with fewer treatment options.
- Biologic medications were used by relatively few patients; however they formed a major share of the medication costs.

This summary slide represents the opinions of the authors, and not necessarily the opinions of the publisher or editorial board. This material has been peer reviewed. For a full list of acknowledgments and conflicts of interest for all authors of this article, please see the full text online.
